# Supplementary material for: Oxidative degradation of gentamicin present in water by an electro-Fenton process and biodegradability improvement
Source: publisher site journal article supplement (doi:10.1515/chem-2019-0110), 2019-11-13
Supplement: Supplementary file 1 [file j_chem-2019-0110_sm.pdf]

## Supplementary Information

Mohamed Réda Arhoutane, Muna Shueai Yahya, Miloud El Karbane, Kacem El Kacemi

## Supplement: Oxidative degradation of gentamicin present in water by an electro-Fenton process and biodegradability improvement

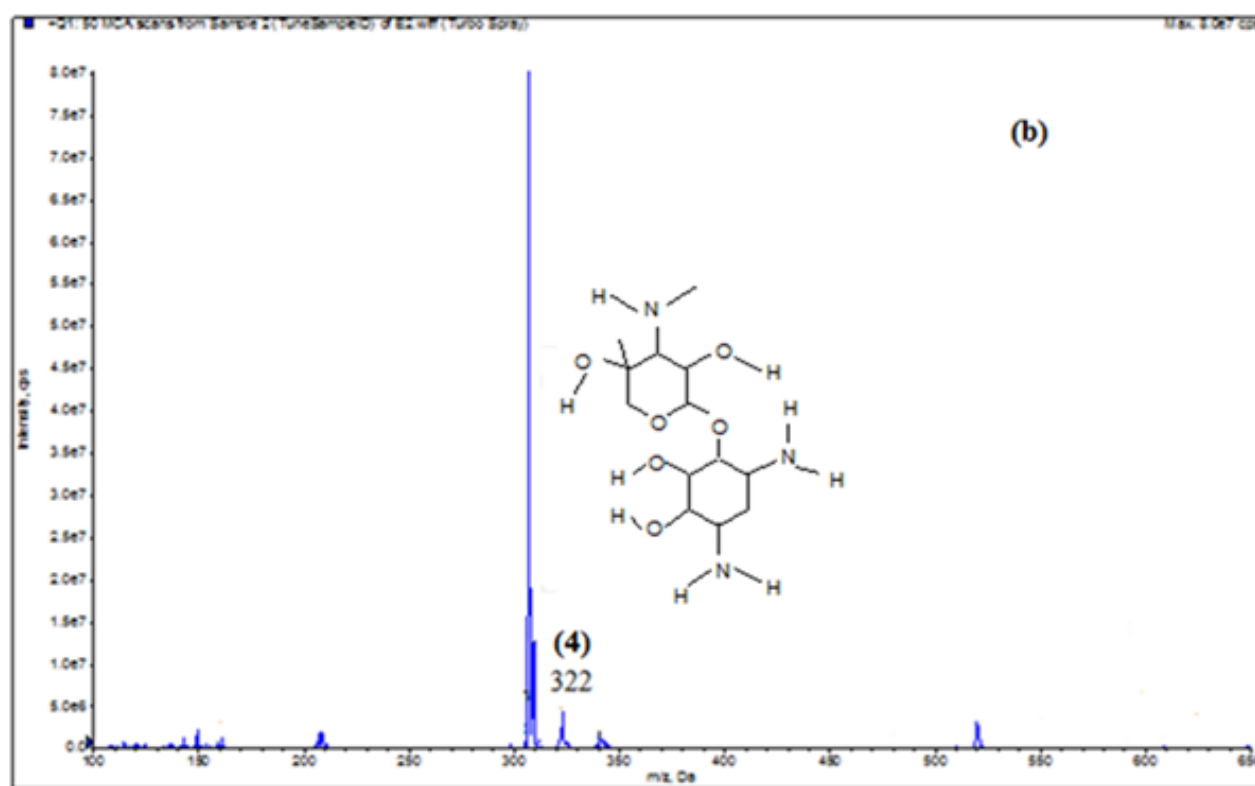

**Figure SI-1:** Chromatograms showing the diminution of the existence of the gentamicin in the solution during the first 40 min of treatment by electro-Fenton process.  $[\text{Fe}^{2+}] = 0.5 \text{ mM}$ ,  $I = 60 \text{ (mA / cm}^2\text{)}$ ,  $[\text{Na}_2\text{SO}_4] = 0.05 \text{ M}$ ,  $V = 200 \text{ ml}$ .

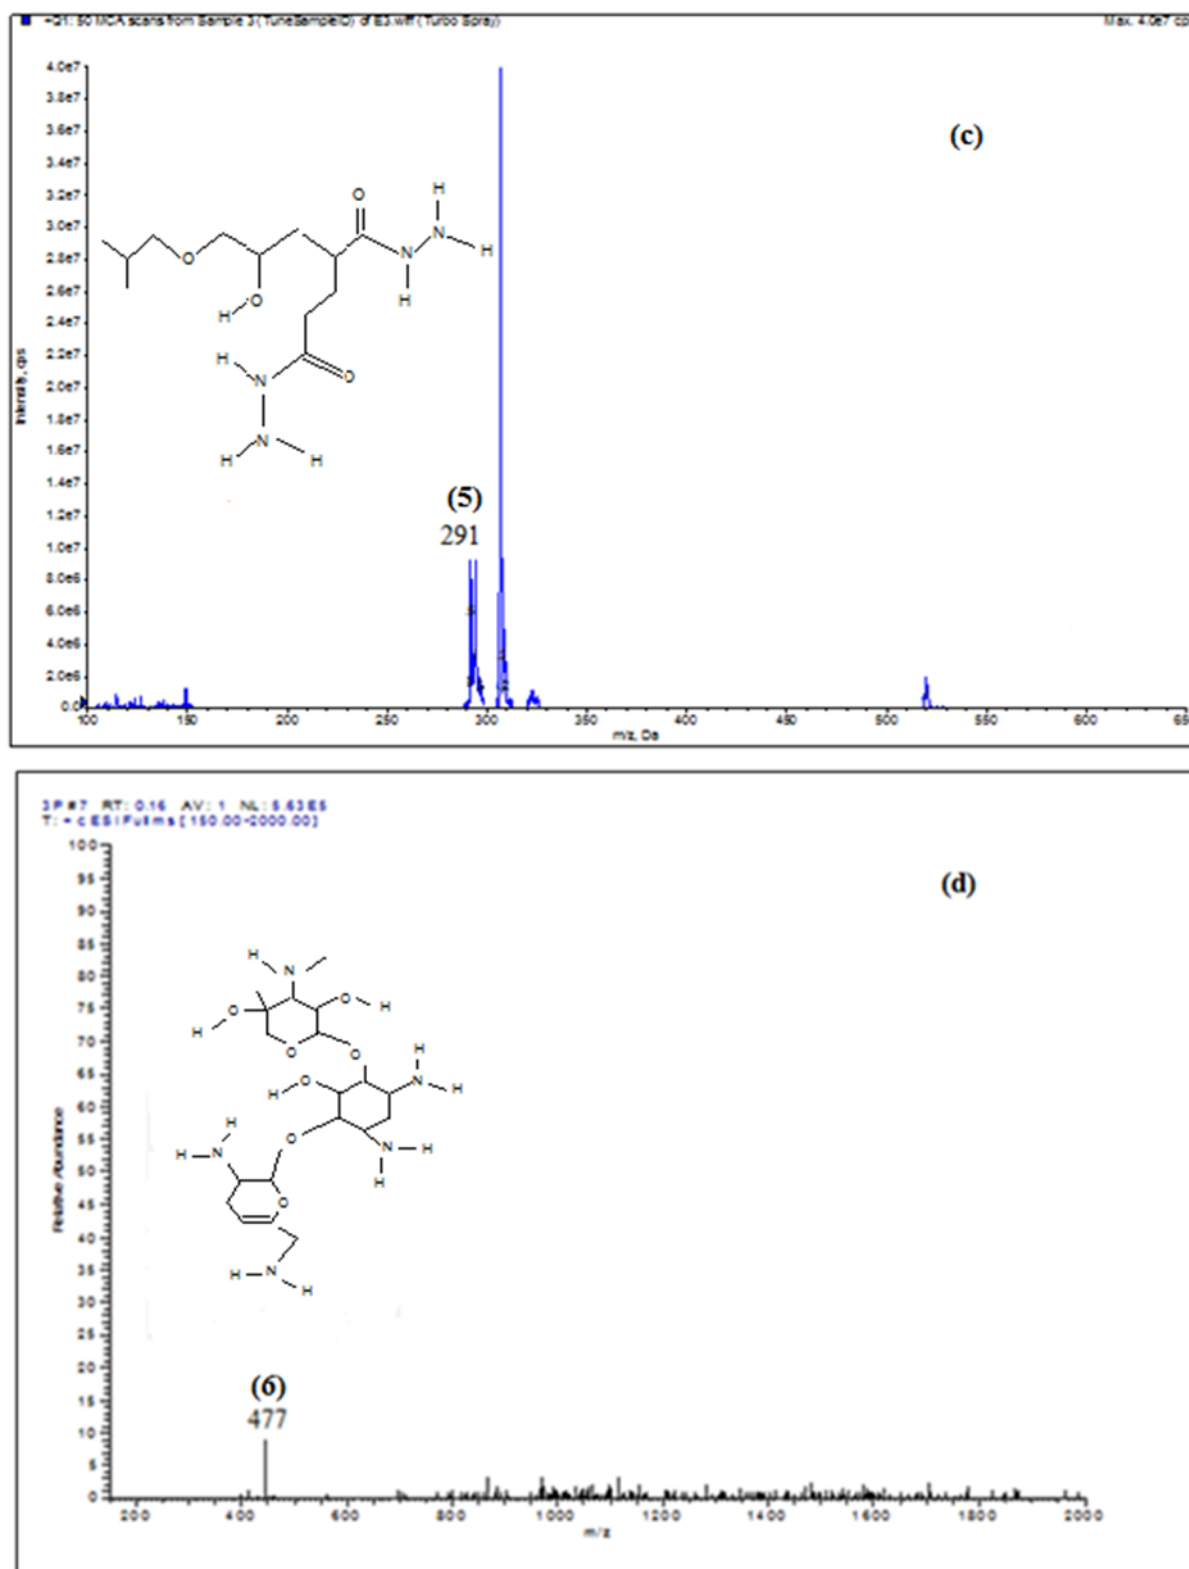

**Figure SI-2:** (a, b, c, d) Mass spectra of intermediate products in the solution during 60 min by electro-Fenton process of the gentamicin.  $[\text{Fe}^{2+}] = 0.5 \text{ mM}$ ,  $I = 100(\text{mA} / \text{cm}^2)$ ,  $[\text{Na}_2\text{SO}_4] = 0.05 \text{ mM}$ , pH 3.
